# Supplementary material for: Disease-associated Streptococcus suis (DASS) in lactation: detection patterns and implications for control
Source: Porcine Health Manag. 2025 Nov 7;11:57. doi: 10.1186/s40813-025-00469-y (PMC12595806; doi:10.1186/s40813-025-00469-y)
Supplement: Supplementary file 1 — Additional File 1 [file 40813_2025_469_MOESM1_ESM.xlsx]

## Sheet: Sheet13
Row Labels	Count of Serotype
1	20
2	42
3	11
4	14
5	27
7	17
8	17
9	31
10	4
11	1
12	2
13	1
14	45
15	4
16	2
18	2
19	1
21	1
23	24
24	1
28	3
29	6
30	1
31	6
1,2	14
Grand Total	297

## Sheet: Sheet1
			Serotype
			1
			1
			1
			1
			1
			1
			1
			1
			1
			1
			1
			1
			1
			1
			1
			1
			1
			1
			1
			1
			2
			2
			2
			2
			2
			2
			2
			2
			2
			2
			2
			2
			2
			2
			2
			2
			2
			2
			2
			2
			2
			2
			2
			2
			2
			2
			2
			2
			2
			2
			2
			2
			2
			2
			2
			2
			2
			2
			2
			2
			2
			2
			3
			3
			3
			3
			3
			3
			3
			3
			3
			3
			3
			4
			4
			4
			4
			4
			4
			4
			4
			4
			4
			4
			4
			4
			4
			5
			5
			5
			5
			5
			5
			5
			5
			5
			5
			5
			5
			5
			5
			5
			5
			5
			5
			5
			5
			5
			5
			5
			5
			5
			5
			5
			7
			7
			7
			7
			7
			7
			7
			7
			7
			7
			7
			7
			7
			7
			7
			7
			7
			8
			8
			8
			8
			8
			8
			8
			8
			8
			8
			8
			8
			8
			8
			8
			8
			8
			9
			9
			9
			9
			9
			9
			9
			9
			9
			9
			9
			9
			9
			9
			9
			9
			9
			9
			9
			9
			9
			9
			9
			9
			9
			9
			9
			9
			9
			9
			9
			10
			10
			10
			10
			11
			12
			12
			13
			14
			14
			14
			14
			14
			14
			14
			14
			14
			14
			14
			14
			14
			14
			14
			14
			14
			14
			14
			14
			14
			14
			14
			14
			14
			14
			14
			14
			14
			14
			14
			14
			14
			14
			14
			14
			14
			14
			14
			14
			14
			14
			14
			14
			14
			15
			15
			15
			15
			16
			16
			18
			18
			19
			21
			23
			23
			23
			23
			23
			23
			23
			23
			23
			23
			23
			23
			23
			23
			23
			23
			23
			23
			23
			23
			23
			23
			23
			23
			24
			28
			28
			28
			29
			29
			29
			29
			29
			29
			30
			31
			31
			31
			31
			31
			31
			1,2
			1,2
			1,2
			1,2
			1,2
			1,2
			1,2
			1,2
			1,2
			1,2
			1,2
			1,2
			1,2
			1,2

## Sheet: File 1
Isolate ID	SSU_RS01130_PCR	SSU_RS01130_Ct	Group	recN_Ct	recN_PCR	Serotype	Clonal complex	ST
M-B11-351	Negative	>40	Non-pathogenic	14.5034	Positive	4	Singleton	2404
M-B5-199_S27	Negative	>40	Non-pathogenic	17.3688	Positive	5	1358	1358
M-B21-547	Negative	>40	Non-pathogenic	18.1594	Positive	6	Singleton	949
M-B13-399	Negative	>40	Non-pathogenic	17.2515	Positive	7	2377	1194
M-B14-426	Negative	>40	Non-pathogenic	16.4266	Positive	7	Singleton	1369
M-B27-647	Negative	>40	Non-pathogenic	17.0495	Positive	7	Singleton	1369
M-B7-268_S10	Negative	>40	Non-pathogenic	16.7907	Positive	7	Singleton	1369
108025D_S24	Negative	>40	Non-pathogenic	17.3376	Positive	9	2377	1381
2020Jan-S.suis-30_S30	Negative	>40	Non-pathogenic	17.0213	Positive	9	2377	1381
Maria-B2-9_S9	Negative	37.6576	Non-pathogenic	18.2322	Positive	9	2377	1381
M-B10-335	Negative	38.3446	Non-pathogenic	17.5957	Positive	9	1420	789
M-B11-344	Negative	>40	Non-pathogenic	22.5064	Positive	9	1198	1198
M-B14-422	Negative	>40	Non-pathogenic	24.2027	Positive	9	2408	2408
M-B14-423	Negative	>40	Non-pathogenic	22.9481	Positive	9	Singleton	2409
M-B14-424	Negative	>40	Non-pathogenic	25.2533	Positive	9	2408	2408
M-B14-425	Negative	>40	Non-pathogenic	15.5393	Positive	9	1356	1356
M-B15-433_S4	Negative	>40	Non-pathogenic	14.362	Positive	9	1198	1198
M-B17-465	Negative	>40	Non-pathogenic	16.5616	Positive	9	2377	1200
M-B17-474	Negative	>40	Non-pathogenic	16.8198	Positive	9	2377	1200
M-B17-479	Negative	>40	Non-pathogenic	16.3783	Positive	9	2377	1200
M-B17-480	Negative	>40	Non-pathogenic	15.5833	Positive	9	2377	1200
M-B20-531	Negative	>40	Non-pathogenic	18.1122	Positive	9	2498	2487
M-B4-157	Negative	38.177	Non-pathogenic	24.3676	Positive	9	Singleton	1394
M-B5-200_S28	Negative	>40	Non-pathogenic	16.3778	Positive	9	Singleton	2398
4057-74_S74	Negative	>40	Non-pathogenic	23.7847	Positive	10	Singleton	1335
Maria-B2-4_S4	Negative	>40	Non-pathogenic	16.1257	Positive	12	Not applicable	undetermined
2020Jan-S.suis-15_S15	Negative	>40	Non-pathogenic	18.0184	Positive	16	Singleton	1947
M-B11-355	Negative	>40	Non-pathogenic	18.657	Positive	16	1827	1827
M-B11-356	Negative	>40	Non-pathogenic	16.2622	Positive	16	1827	1827
M-B14-427	Negative	>40	Non-pathogenic	17.4263	Positive	16	Singleton	2393
M-B18-505	Negative	39.9035	Non-pathogenic	18.4068	Positive	16	Singleton	1398
M-B7-261_S3	Negative	>40	Non-pathogenic	17.2457	Positive	16	Singleton	1367
M-B6-204_S4	Negative	>40	Non-pathogenic	17.2031	Positive	18	1358	1358
108-28D_S27	Negative	>40	Non-pathogenic	19.1808	Positive	28	Singleton	1382
Maria-B3-133_S20	Negative	>40	Non-pathogenic	19.4361	Positive	31	1686	1345
M-B13-382	Negative	>40	Non-pathogenic	24.1399	Positive	31	Singleton	2284
M-B18-487	Negative	>40	Non-pathogenic	21.4886	Positive	31	Singleton	2413
M-B26-614	Negative	>40	Non-pathogenic	21.9408	Positive	31	Singleton	1952
M-B26-617	Negative	>40	Non-pathogenic	23.6836	Positive	31	Singleton	2406
M-B9-291_S1_L001	Negative	>40	Non-pathogenic	22.0182	Positive	31	Singleton	1828
1237-13_S13	Negative	>40	Non-pathogenic	18.295	Positive	NT	Singleton	1404
Maria-B2-30_S30	Negative	>40	Non-pathogenic	18.0642	Positive	NT	Singleton	1342
M-B12-360_S16_L001	Negative	>40	Non-pathogenic	18.1002	Positive	NT	Singleton	2683
M-B26-610	Negative	>40	Non-pathogenic	16.7844	Positive	NT	1384	1384
M-B6-209_S9	Negative	37.6593	Non-pathogenic	22.1281	Positive	NT	Singleton	1362
M-B4-159_S22	Positive	16.2755	Pathogenic	18.2719	Positive	8	14	1352
M-B10-336	Positive	19.5778	Pathogenic	21.3727	Positive	1	1	1
M-B10-337	Positive	17.8947	Pathogenic	16.4983	Positive	1	1	1
M-B11-338	Positive	13.5403	Pathogenic	17.2393	Positive	1	1	1
M-B11-339	Positive	18.108	Pathogenic	18.2779	Positive	1	1	1
M-B13-377	Positive	17.157	Pathogenic	15.7738	Positive	1	1	1
M-B14-428	Positive	18.2827	Pathogenic	16.8788	Positive	1	1	1
M-B17-459	Positive	18.1742	Pathogenic	16.4331	Positive	1	1	1
M-B17-461	Positive	17.9077	Pathogenic	16.4302	Positive	1	1	1
M-B17-466	Positive	18.3737	Pathogenic	17.3038	Positive	1	1	1
M-B17-467	Positive	18.1795	Pathogenic	18.3073	Positive	1	1	1
M-B17-468	Positive	19.3667	Pathogenic	17.6077	Positive	1	1	1
M-B17-469	Positive	19.0054	Pathogenic	17.2128	Positive	1	1	1
M-B17-470	Positive	15.9184	Pathogenic	17.5724	Positive	1	1	1
M-B17-475	Positive	17.7555	Pathogenic	16.1738	Positive	1	1	1
M-B17-476	Positive	18.0188	Pathogenic	16.6074	Positive	1	1	1
M-B17-481	Positive	18.7273	Pathogenic	17.5751	Positive	1	1	1
M-B18-489	Positive	19.3591	Pathogenic	17.6662	Positive	1	1	1
M-B18-498	Positive	18.6936	Pathogenic	17.0615	Positive	1	1	1
M-B18-500	Positive	18.6666	Pathogenic	17.1146	Positive	1	1	1
M-B18-507	Positive	18.5159	Pathogenic	17.9243	Positive	1	1	1
M-B18-511	Positive	18.5386	Pathogenic	18.0716	Positive	1	1	1
M-B19-516	Positive	18.6553	Pathogenic	16.8936	Positive	1	1	1
M-B21-546	Positive	19.0297	Pathogenic	18.5582	Positive	1	1	1
M-B21-548	Positive	19.9989	Pathogenic	18.2432	Positive	1	1	1
M-B23-558	Positive	18.2871	Pathogenic	17.0799	Positive	1	1	1
M-B26-583	Positive	18.3543	Pathogenic	17.034	Positive	1	1	1
M-B26-584	Positive	18.5168	Pathogenic	17.1967	Positive	1	1	1
M-B26-585	Positive	13.0749	Pathogenic	16.3529	Positive	1	1	1
M-B26-587	Positive	17.6482	Pathogenic	17.2708	Positive	1	1	1
M-B26-588	Positive	18.1405	Pathogenic	17.643	Positive	1	1	1
M-B26-599	Positive	16.5723	Pathogenic	15.0983	Positive	1	1	1
M-B26-601	Positive	16.2755	Pathogenic	14.5888	Positive	1	1	1
M-B26-606	Positive	18.2813	Pathogenic	17.0056	Positive	1	1	1
M-B26-607	Positive	16.2563	Pathogenic	14.7844	Positive	1	1	1
M-B26-624	Positive	17.5426	Pathogenic	17.4065	Positive	1	1	1
M-B27-648	Positive	17.6628	Pathogenic	16.056	Positive	1	1	1
M-B9-300_S10_L001	Positive	18.2291	Pathogenic	16.5017	Positive	1	1	1
M-B9-302_S12_L001	Positive	19.2702	Pathogenic	17.7989	Positive	1	1	1
M-B9-305_S15_L001	Positive	19.3297	Pathogenic	19.1458	Positive	1	1	1
M-B9-306_S16_L001	Positive	18.0329	Pathogenic	16.3613	Positive	1	1	1
M-B9-309_S19_L001	Positive	12.9582	Pathogenic	17.6656	Positive	1	1	1
M-B10-324	Positive	18.4258	Pathogenic	16.8213	Positive	2	28	28
M-B10-329	Positive	17.8547	Pathogenic	17.6666	Positive	2	25	25
M-B11-340	Positive	16.2597	Pathogenic	14.4589	Positive	2	1943	1943
M-B11-341	Positive	16.1209	Pathogenic	14.2829	Positive	2	1943	1943
M-B11-345	Positive	18.1389	Pathogenic	18.539	Positive	2	1943	1943
M-B19-521	Positive	19.0393	Pathogenic	17.385	Positive	2	28	28
M-B23-557	Positive	18.2836	Pathogenic	16.9337	Positive	2	1	1
M-B26-589	Positive	18.6612	Pathogenic	18.4958	Positive	2	28	28
M-B26-590	Positive	19.224	Pathogenic	17.7057	Positive	2	28	28
M-B26-593	Positive	17.043	Pathogenic	15.5723	Positive	2	28	28
M-B26-594	Positive	18.2649	Pathogenic	17.0916	Positive	2	28	28
M-B26-595	Positive	17.3702	Pathogenic	16.0001	Positive	2	28	28
M-B26-622	Positive	15.5447	Pathogenic	17.9196	Positive	2	28	28
M-B26-623	Positive	18.5002	Pathogenic	17.4667	Positive	2	28	28
M-B9-297_S7_L001	Positive	19.5491	Pathogenic	18.0563	Positive	2	28	28
M-B11-347	Positive	17.7062	Pathogenic	17.0277	Positive	3	1826	1826
M-B11-349	Positive	16.8362	Pathogenic	15.4925	Positive	3	1826	1826
M-B26-597	Positive	16.6978	Pathogenic	15.348	Positive	3	117	117
M-B26-598	Positive	16.2705	Pathogenic	14.6208	Positive	3	117	117
M-B27-645	Positive	18.2835	Pathogenic	16.6492	Positive	3	108	969
M-B27-652	Positive	8.837	Pathogenic	13.2333	Positive	3	839	839
M-B11-342	Positive	13.2629	Pathogenic	15.0842	Positive	4	1826	1826
M-B11-343	Positive	17.0802	Pathogenic	15.5924	Positive	4	1826	1826
M-B11-346	Positive	16.0184	Pathogenic	14.3426	Positive	4	1826	1826
M-B11-348	Positive	17.4626	Pathogenic	16.1928	Positive	4	1826	1826
M-B13-379	Positive	16.834	Pathogenic	15.3282	Positive	4	485	485
M-B26-591	Positive	16.3163	Pathogenic	14.3016	Positive	4	485	485
M-B26-592	Positive	15.7168	Pathogenic	13.396	Positive	4	485	485
M-B15-447_S18	Positive	16.0368	Pathogenic	14.0423	Positive	5	977	977
M-B18-502	Positive	18.956	Pathogenic	17.252	Positive	5	89	89
M-B19-514	Positive	16.6553	Pathogenic	14.8829	Positive	5	977	977
M-B19-517	Positive	18.1466	Pathogenic	16.4257	Positive	5	977	977
M-B19-525	Positive	18.8771	Pathogenic	17.3892	Positive	5	977	977
M-B27-655	Positive	16.9157	Pathogenic	16.6827	Positive	5	839	839
108-22D_S21	Positive	18.0704	Pathogenic	16.56	Positive	7	94	1360
2020Jan-S.suis-36_S36	Positive	16.2019	Pathogenic	14.3795	Positive	7	94	1360
M-B13-380	Positive	15.885	Pathogenic	15.0307	Positive	7	Singleton	2374
M-B17-471	Positive	16.0349	Pathogenic	15.2523	Positive	7	Singleton	2374
M-B27-653	Positive	16.1655	Pathogenic	15.9969	Positive	7	839	1640
M-B27-654	Positive	18.6549	Pathogenic	15.1122	Positive	7	839	1640
M-B17-473	Positive	16.8871	Pathogenic	15.1275	Positive	8	87	2411
M-B18-484	Positive	18.4582	Pathogenic	16.7783	Positive	8	87	87
M-B18-486	Positive	17.6367	Pathogenic	15.9304	Positive	8	87	87
M-B20-533	Positive	17.4605	Pathogenic	15.6438	Positive	8	87	87
M-B21-549	Positive	17.2161	Pathogenic	15.4191	Positive	8	Not applicable	undetermined
M-B9-298_S8_L001	Positive	16.8373	Pathogenic	15.1496	Positive	8	87	87
M-B19-515	Positive	18.5088	Pathogenic	16.8678	Positive	9	1826	2403
M-B23-555	Positive	16.7027	Pathogenic	15.2014	Positive	9	1826	2403
M-B25-581_S20_L001	Positive	18.0384	Pathogenic	17.5192	Positive	9	16	16
M-B26-620	Positive	17.8421	Pathogenic	16.9249	Positive	9	108	1193
4057-61_S61	Positive	17.0547	Pathogenic	15.2046	Positive	11	1331	1331
M-B11-350	Positive	18.5257	Pathogenic	17.2865	Positive	14	1	1
M-B17-463	Positive	17.9185	Pathogenic	16.2238	Positive	14	1	1
M-B19-518	Positive	16.9751	Pathogenic	14.9888	Positive	14	839	839
M-B20-528	Positive	19.7981	Pathogenic	18.1757	Positive	14	1	1
M-B27-651	Positive	18.9984	Pathogenic	15.9159	Positive	14	28	28
M-B6-224_S19	Positive	18.1198	Pathogenic	16.3829	Positive	14	1372	1363
M-B9-308_S18_L001	Positive	19.1403	Pathogenic	17.8623	Positive	14	1	1
0435-21_S21	Positive	19.2284	Pathogenic	17.6157	Positive	18	1178	1377
M-B17-482	Positive	16.0848	Pathogenic	14.2624	Positive	19	Not applicable	Poor genome
M-B19-519	Positive	16.2576	Pathogenic	14.2393	Positive	19	108	108
M-B9-299_S9_L001	Positive	19.8022	Pathogenic	18.2471	Positive	19	1178	1829
1237-30_S30	Positive	17.4422	Pathogenic	16.2049	Positive	23	108	1376
M-B12-363_S19_L001	Positive	15.5554	Pathogenic	15.6772	Positive	23	108	108
M-B18-495	Positive	17.5738	Pathogenic	16.0061	Positive	23	89	89
M-B18-496	Positive	16.9796	Pathogenic	15.3489	Positive	23	89	89
M-B20-532	Positive	18.2795	Pathogenic	16.7231	Positive	23	108	108
M-B25-579_S18_L001	Positive	17.2035	Pathogenic	15.7276	Positive	23	108	108
M-B25-580_S19_L001	Positive	15.3352	Pathogenic	15.3654	Positive	23	108	108
M-B27-643	Positive	13.3188	Pathogenic	15.1111	Positive	23	108	108
M-B9-294_S4_L001	Positive	16.8471	Pathogenic	15.1485	Positive	23	108	108
M-B9-295_S5_L001	Positive	17.0672	Pathogenic	15.2703	Positive	23	108	108
M-B20-529	Positive	17.6889	Pathogenic	17.0791	Positive	25	Not applicable	undetermined
M-B20-530	Positive	17.1634	Pathogenic	36.1438	Positive	25	Singleton	1694
M-B21-543	Positive	17.9026	Pathogenic	16.2549	Positive	28	94	1380
M-B26-612	Positive	17.0264	Pathogenic	16.922	Positive	31	117	117
0435-20_S20	Positive	17.07	Pathogenic	15.5592	Positive	1/2	1178	1377
M-B10-323	Positive	20.9014	Pathogenic	19.2485	Positive	1/2	28	28
M-B10-325	Positive	19.6031	Pathogenic	18.0463	Positive	1/2	28	28
M-B10-326	Positive	19.9895	Pathogenic	18.3854	Positive	1/2	28	28
M-B10-327	Positive	19.9884	Pathogenic	18.3752	Positive	1/2	28	28
M-B10-333	Positive	17.8104	Pathogenic	16.6074	Positive	1/2	28	28
M-B10-334	Positive	20.6242	Pathogenic	19.2308	Positive	1/2	28	28
M-B12-376_S11_L001	Positive	19.7024	Pathogenic	18.2439	Positive	1/2	28	28
M-B20-534-1	Positive	18.0668	Pathogenic	16.2564	Positive	1/2	28	28
M-B23-556	Positive	17.741	Pathogenic	16.6203	Positive	1/2	28	28
M-B9-292_S2_L001	Positive	13.487	Pathogenic	17.9231	Positive	1/2	28	28
M-B9-293_S3_L001	Positive	18.871	Pathogenic	18.5727	Positive	1/2	28	28
M-B9-303_S13_L001	Positive	20.0048	Pathogenic	18.4134	Positive	1/2	28	28
4057-60_S60	Positive	18.3311	Pathogenic	16.5707	Positive	Untypable	1331	1331
4057-62_S62	Positive	16.5177	Pathogenic	14.5149	Positive	Untypable	1331	1331
4057-69_S69	Positive	20.1163	Pathogenic	18.3374	Positive	Untypable	Singleton	1334
M-B10-328	Positive	19.2798	Pathogenic	17.6803	Positive	Untypable	28	28
M-B12-364_S20_L001	Positive	16.3297	Pathogenic	16.2274	Positive	Untypable	1	1
M-B12-365_S21_L001	Positive	19.2694	Pathogenic	18.1428	Positive	Untypable	1	1
M-B12-373_S29_L001	Positive	17.57	Pathogenic	16.2088	Positive	Untypable	1	1
M-B12-374_S30_L001	Positive	20.5707	Pathogenic	16.8422	Positive	Untypable	1	1
M-B12-375_S31_L001	Positive	17.3607	Pathogenic	17.2179	Positive	Untypable	1	1
M-B13-378	Positive	17.0767	Pathogenic	15.566	Positive	Untypable	1	1
M-B13-383	Positive	21.0974	Pathogenic	20.3551	Positive	Untypable	108	969
M-B13-384	Positive	19.7499	Pathogenic	18.7823	Positive	Untypable	28	961
M-B14-429	Positive	18.1913	Pathogenic	16.8476	Positive	Untypable	1	1
M-B17-458	Positive	18.7709	Pathogenic	17.153	Positive	Untypable	1	1
M-B17-460	Positive	17.6403	Pathogenic	16.0657	Positive	Untypable	1	1
M-B17-464	Positive	19.3217	Pathogenic	17.7048	Positive	Untypable	25	25
M-B17-472	Positive	19.2877	Pathogenic	17.8074	Positive	Untypable	1	1
M-B17-477	Positive	18.184	Pathogenic	16.8695	Positive	Untypable	1	1
M-B18-485	Positive	16.4174	Pathogenic	14.3362	Positive	Untypable	1	1
M-B18-488	Positive	19.1271	Pathogenic	17.3713	Positive	Untypable	1	1
M-B18-499	Positive	18.7494	Pathogenic	17.0804	Positive	Untypable	1	1
M-B18-506	Positive	19.1256	Pathogenic	17.3517	Positive	Untypable	1	1
M-B18-512	Positive	19.1037	Pathogenic	17.1757	Positive	Untypable	1	1
M-B21-537	Positive	19.0426	Pathogenic	17.4299	Positive	Untypable	28	28
M-B21-539	Positive	16.2734	Pathogenic	14.1434	Positive	Untypable	87	2399
M-B21-542	Positive	20.2347	Pathogenic	18.7831	Positive	Untypable	28	961
M-B26-600	Positive	17.1627	Pathogenic	15.8516	Positive	Untypable	1	1
M-B27-658	Positive	17.601	Pathogenic	17.5864	Positive	Untypable	1	1
M-B6-249_S44	Positive	17.1667	Pathogenic	15.5976	Positive	Untypable	977	1366
M-B7-273_S15	Positive	19.6935	Pathogenic	18.2645	Positive	Untypable	28	1371
M-B7-275_S17	Positive	18.1146	Pathogenic	16.4337	Positive	Untypable	1372	1372
M-B20-534-2	Positive	18.0763	Pathogenic	16.1511	Positive	1/2	28	28
