# Supplementary material for: Disease-associated Streptococcus suis (DASS) in lactation: detection patterns and implications for control
Source: Porcine Health Manag. 2025 Nov 7;11:57. doi: 10.1186/s40813-025-00469-y (PMC12595806; doi:10.1186/s40813-025-00469-y)
Supplement: Supplementary file 2 — Additional File 2 [file 40813_2025_469_MOESM2_ESM.xlsx]

## Sheet: File 2
Isolate ID	Serotype	Group	Clonal complex	ST	SSU_RS01130
0435-12_S12	1	Pathogenic	1	1	Positive
0435-14_S14	1	Pathogenic	1	1	Positive
0435-17_S17	1	Pathogenic	1	1	Positive
0435-22_S22	1	Pathogenic	1	1	Positive
0435-28_S28	1	Pathogenic	1	1	Positive
0435-29_S29	1	Pathogenic	1	1	Positive
108-100D_S95	1	Pathogenic	1	1	Positive
108-101D_S96	1	Pathogenic	1	1	Positive
108-20D_S20	1	Pathogenic	1	1	Positive
108-32D_S31	1	Pathogenic	1	1	Positive
108-34D_S33	1	Pathogenic	1	1	Positive
108-35D_S34	1	Pathogenic	1	1	Positive
108-36D_S35	1	Pathogenic	1	1	Positive
108-38D_S37	1	Pathogenic	1	1	Positive
108-39D_S38	1	Pathogenic	1	1	Positive
108-40D_S39	1	Pathogenic	1	1	Positive
108-47D_S46	1	Pathogenic	1	1	Positive
108-49D_S48	1	Pathogenic	1	1	Positive
108-57D_S54	1	Pathogenic	1	1	Positive
108-58D_S55	1	Pathogenic	1	1	Positive
108-59D_S56	1	Pathogenic	1	1	Positive
108-75D_S70	1	Pathogenic	1	1	Positive
108-77D_S72	1	Pathogenic	1	1	Positive
108-78D_S73	1	Pathogenic	1	1	Positive
108-81D_S76	1	Pathogenic	1	1	Positive
108-85D_S80	1	Pathogenic	1	1	Positive
1237-17_S17	1	Pathogenic	1	1	Positive
1237-31_S31	1	Pathogenic	1	1	Positive
1237-32_S32	1	Pathogenic	1	1	Positive
1237-33_S33	1	Pathogenic	1	1	Positive
1237-34_S34	1	Pathogenic	1	1	Positive
1237-36_S36	1	Pathogenic	1	1	Positive
1237-37_S37	1	Pathogenic	1	1	Positive
1237-43_S43	1	Pathogenic	1	1	Positive
2020Jan-S.suis-25_S25	1	Pathogenic	1	1	Positive
2020Jan-S.suis-68_S67	1	Pathogenic	1	1	Positive
2020Jan-S.suis-70_S69	1	Pathogenic	1	1	Positive
2020Jan-S.suis-71_S70	1	Pathogenic	1	1	Positive
2020Jan-S.suis-9_S9	1	Pathogenic	1	1	Positive
2957-43_S43	1	Pathogenic	1	1	Positive
2972-2_S27	1	Pathogenic	1	1	Positive
4057-19_S19	1	Pathogenic	1	1	Positive
4057-67_S67	1	Pathogenic	1	1	Positive
Maria-B3-124_S11	1	Pathogenic	1	1	Positive
Maria-B3-129_S16	1	Pathogenic	1	1	Positive
Maria-B3-130_S17	1	Pathogenic	1	1	Positive
M-B10-336	1	Pathogenic	1	1	Positive
M-B10-337	1	Pathogenic	1	1	Positive
M-B11-338	1	Pathogenic	1	1	Positive
M-B11-339	1	Pathogenic	1	1	Positive
M-B13-377	1	Pathogenic	1	1	Positive
M-B14-428	1	Pathogenic	1	1	Positive
M-B17-459	1	Pathogenic	1	1	Positive
M-B17-466	1	Pathogenic	1	1	Positive
M-B17-467	1	Pathogenic	1	1	Positive
M-B17-468	1	Pathogenic	1	1	Positive
M-B17-469	1	Pathogenic	1	1	Positive
M-B17-470	1	Pathogenic	1	1	Positive
M-B17-475	1	Pathogenic	1	1	Positive
M-B17-476	1	Pathogenic	1	1	Positive
M-B17-481	1	Pathogenic	1	1	Positive
M-B4-149_S12	1	Pathogenic	1	1	Positive
M-B5-174_S2	1	Pathogenic	1	1	Positive
M-B5-176_S4	1	Pathogenic	1	1	Positive
M-B5-178_S6	1	Pathogenic	1	1	Positive
M-B6-231_S26	1	Pathogenic	1	1	Positive
M-B6-241_S36	1	Pathogenic	1	1	Positive
M-B6-258_S53	1	Pathogenic	1	1	Positive
M-B7-265_S7	1	Pathogenic	1	1	Positive
M-B7-267_S9	1	Pathogenic	1	1	Positive
M-B7-272_S14	1	Pathogenic	1	1	Positive
M-B8-276_S8	1	Pathogenic	1	1	Positive
M-B8-277_S9	1	Pathogenic	1	1	Positive
M-B8-278_S10	1	Pathogenic	1	1	Positive
M-B8-282_S14	1	Pathogenic	1	1	Positive
M-B8-284_S16	1	Pathogenic	1	1	Positive
M-B8-285_S17	1	Pathogenic	1	1	Positive
M-B8-286_S18	1	Pathogenic	1	1	Positive
M-B8-287_S19	1	Pathogenic	1	1	Positive
M-B8-288_S20	1	Pathogenic	1	1	Positive
M-B8-289_S21	1	Pathogenic	1	1	Positive
M-B9-300_S10_L001	1	Pathogenic	1	1	Positive
M-B9-302_S12_L001	1	Pathogenic	1	1	Positive
M-B9-305_S15_L001	1	Pathogenic	1	1	Positive
M-B9-306_S16_L001	1	Pathogenic	1	1	Positive
M-B9-307_S17_L001	1	Pathogenic	1	1	Positive
M-B9-309_S19_L001	1	Pathogenic	1	1	Positive
0435-2_S2	2	Pathogenic	28	28	Positive
0435-32_S32	2	Pathogenic	28	28	Positive
108-52D_S50	2	Pathogenic	28	28	Positive
108-54D_S51	2	Pathogenic	28	28	Positive
108-62D_S59	2	Pathogenic	28	28	Positive
108-83D_S78	2	Pathogenic	28	28	Positive
108-88D_S83	2	Pathogenic	28	28	Positive
108-89D_S84	2	Pathogenic	28	28	Positive
108-92D_S87	2	Pathogenic	28	28	Positive
108-98D_S93	2	Pathogenic	28	28	Positive
1236-83_S83	2	Pathogenic	28	28	Positive
2020Jan-S.suis-28_S28	2	Pathogenic	28	28	Positive
2020Jan-S.suis-31_S31	2	Pathogenic	28	28	Positive
2020Jan-S.suis-33_S33	2	Pathogenic	28	28	Positive
2020Jan-S.suis-35_S35	2	Pathogenic	28	28	Positive
2020Jan-S.suis-7_S7	2	Pathogenic	28	28	Positive
2957-35_S35	2	Pathogenic	28	28	Positive
2957-41_S41	2	Pathogenic	28	28	Positive
2957-7_S7	2	Pathogenic	28	28	Positive
2957-8_S8	2	Pathogenic	28	28	Positive
4057-31_S31	2	Pathogenic	28	28	Positive
4057-35_S35	2	Pathogenic	28	28	Positive
4057-42_S42	2	Pathogenic	28	28	Positive
4057-43_S43	2	Pathogenic	28	28	Positive
4057-47_S47	2	Pathogenic	28	28	Positive
M-B10-324	2	Pathogenic	28	28	Positive
M-B9-297_S7_L001	2	Pathogenic	28	28	Positive
0435-24_S24	2	Pathogenic	28	961	Positive
0435-3_S3	2	Pathogenic	28	961	Positive
108-23D_S22	2	Pathogenic	28	961	Positive
2020Jan-S.suis-11_S11	2	Pathogenic	28	961	Positive
2957-29_S29	2	Pathogenic	28	961	Positive
4057-7_S7	2	Pathogenic	28	961	Positive
M-B5-186_S14	2	Pathogenic	28	1180	Positive
M-B11-340	2	Pathogenic	1943	1943	Positive
M-B11-341	2	Pathogenic	1943	1943	Positive
M-B11-345	2	Pathogenic	1943	1943	Positive
4057-28_S28	2	Pathogenic	25	25	Positive
4057-34_S34	2	Pathogenic	25	25	Positive
4057-46_S46	2	Pathogenic	25	25	Positive
4057-48_S48	2	Pathogenic	25	25	Positive
4057-49_S49	2	Pathogenic	25	25	Positive
4057-51_S51	2	Pathogenic	25	25	Positive
M-B10-329	2	Pathogenic	25	25	Positive
M-B6-202_S2	2	Pathogenic	25	25	Positive
1237-6_S6	2	Pathogenic	1	1	Positive
Maria-B3-121_S8	2	Pathogenic	1	1	Positive
M-B7-260_S2_	2	Pathogenic	1	1	Positive
108-93D_S88	3	Pathogenic	94	94	Positive
1236-82_S82	3	Pathogenic	94	94	Positive
Maria-B3-118_S5	3	Pathogenic	94	94	Positive
2020Jan-S.suis-13_S13	3	Pathogenic	108	108	Positive
0435-34_S34	3	Pathogenic	839	839	Positive
M-B11-347	3	Pathogenic	1826	1826	Positive
M-B11-349	3	Pathogenic	1826	1826	Positive
108-61D_S58	3	Pathogenic	27	27	Positive
0435-16_S16	3	Pathogenic	108	969	Positive
1237-14_S14	3	Pathogenic	108	969	Positive
2020Jan-S.suis-24_S24	3	Pathogenic	108	969	Positive
Maria-B2-38_S38	3	Pathogenic	108	969	Positive
Maria-B3-125_S12	3	Pathogenic	108	969	Positive
M-B11-351	4	Non-pathogenic	Singleton	2404	Negative
2957-23_S23	4	Pathogenic	485	485	Positive
108-99D_S94	4	Pathogenic	17	17	Positive
M-B5-184_S12	4	Pathogenic	17	17	Positive
0435-23_S23	4	Pathogenic	94	94	Positive
M-B12-366_S22_L001	4	Pathogenic	94	94	Positive
M-B6-222_S17	4	Pathogenic	94	94	Positive
M-B7-274_S16_	4	Pathogenic	94	94	Positive
M-B13-379	4	Pathogenic	485	485	Positive
108-79D_S74	4	Pathogenic	94	962	Positive
M-B11-342	4	Pathogenic	1826	1826	Positive
M-B11-343	4	Pathogenic	1826	1826	Positive
M-B11-346	4	Pathogenic	1826	1826	Positive
M-B11-348	4	Pathogenic	1826	1826	Positive
2957-30_S30	4	Pathogenic	23	1405	Positive
2020Jan-S.suis-21_S21	4	Pathogenic	977	977	Positive
2020Jan-S.suis-32_S32	4	Pathogenic	977	977	Positive
M-B6-243_S38	4	Pathogenic	977	977	Positive
108-51D_S49	5	Non-pathogenic	1359	1359	Negative
M-B5-199_S27	5	Non-pathogenic	1358	1358	Negative
108027D_S26	5	Pathogenic	94	94	Positive
108-60D_S57	5	Pathogenic	94	94	Positive
0435-6_S6	5	Pathogenic	373	373	Positive
4057-52_S52	5	Pathogenic	839	119	Positive
2020Jan-S.suis-19_S19	5	Pathogenic	977	977	Positive
2020Jan-S.suis-37_S37	5	Pathogenic	977	977	Positive
2020Jan-S.suis-74_S73	5	Pathogenic	977	977	Positive
2957-15_S15	5	Pathogenic	977	977	Positive
2957-26_S26	5	Pathogenic	977	977	Positive
4057-11_S11	5	Pathogenic	977	977	Positive
Maria-B3-117_S4	5	Pathogenic	977	977	Positive
M-B15-447_S18	5	Pathogenic	977	977	Positive
M-B4-138_S1	5	Pathogenic	977	977	Positive
M-B4-139_S2	5	Pathogenic	977	977	Positive
M-B4-140_S3	5	Pathogenic	977	977	Positive
M-B4-141_S4	5	Pathogenic	977	977	Positive
M-B4-142_S5	5	Pathogenic	977	977	Positive
M-B4-143_S6	5	Pathogenic	977	977	Positive
M-B4-144_S7	5	Pathogenic	977	977	Positive
M-B4-145_S8	5	Pathogenic	977	977	Positive
M-B4-148_S11	5	Pathogenic	977	977	Positive
4057-77_S77	7	Non-pathogenic	2377	1194	Negative
M-B13-399	7	Non-pathogenic	2377	1194	Negative
Maria-B3-116_S3	7	Non-pathogenic	1198	1343	Negative
M-B14-426	7	Non-pathogenic	Singleton	1369	Negative
M-B7-268_S10	7	Non-pathogenic	Singleton	1369	Negative
0435-10_S10	7	Pathogenic	225	225	Positive
0435-9_S9	7	Pathogenic	225	225	Positive
108-24D_S23	7	Pathogenic	225	225	Positive
2020Jan-S.suis-20_S20	7	Pathogenic	225	225	Positive
2957-4_S4	7	Pathogenic	225	225	Positive
M-B6-223_S18	7	Pathogenic	225	225	Positive
M-B7-264_S6	7	Pathogenic	225	225	Positive
2957-9_S9	7	Pathogenic	29	29	Positive
4057-24_S24	7	Pathogenic	29	29	Positive
M-B6-229_S24	7	Pathogenic	94	94	Positive
108-22D_S21	7	Pathogenic	94	1360	Positive
108-44D_S43	8	Non-pathogenic	1198	1336	Negative
4057-78_S78	8	Non-pathogenic	1198	1336	Negative
4057-23_S23	8	Non-pathogenic	Singleton	2846	Negative
0435-5_S5	8	Pathogenic	87	87	Positive
0435-7_S7	8	Pathogenic	87	87	Positive
2020Jan-S.suis-12_S12	8	Pathogenic	87	87	Positive
4057-26_S26	8	Pathogenic	87	87	Positive
4057-65_S65	8	Pathogenic	87	87	Positive
4057-72_S72	8	Pathogenic	87	87	Positive
Maria-B2-13_S13	8	Pathogenic	87	87	Positive
M-B6-226_S21	8	Pathogenic	87	87	Positive
M-B6-233_S28	8	Pathogenic	87	87	Positive
M-B9-296_S6_L001	8	Pathogenic	87	87	Positive
M-B9-298_S8_L001	8	Pathogenic	87	87	Positive
2972-1_S26	8	Pathogenic	87	1333	Positive
M-B4-159_S22	8	Pathogenic	14	1352	Positive
M-B17-473	8	Pathogenic	87	2411	Positive
M-B10-335	9	Non-pathogenic	1420	789	Negative
4057-30_S30	9	Non-pathogenic	1420	1420	Negative
4057-33_S33	9	Non-pathogenic	1420	1421	Negative
0435-13_S13	9	Non-pathogenic	790	790	Negative
2957-31_S31	9	Non-pathogenic	790	790	Negative
2957-32_S32	9	Non-pathogenic	790	790	Negative
108-76D_S71	9	Non-pathogenic	1198	1198	Negative
108-91D_S86	9	Non-pathogenic	1198	1198	Negative
2957-24_S24	9	Non-pathogenic	1198	1198	Negative
2972-4_S29	9	Non-pathogenic	1198	1198	Negative
4057-22_S22	9	Non-pathogenic	1198	1198	Negative
M-B11-344	9	Non-pathogenic	1198	1198	Negative
M-B15-433_S4	9	Non-pathogenic	1198	1198	Negative
M-B17-465	9	Non-pathogenic	2377	1200	Negative
M-B17-474	9	Non-pathogenic	2377	1200	Negative
M-B17-479	9	Non-pathogenic	2377	1200	Negative
M-B17-480	9	Non-pathogenic	2377	1200	Negative
108025D_S24	9	Non-pathogenic	2377	1381	Negative
2020Jan-S.suis-30_S30	9	Non-pathogenic	2377	1381	Negative
4057-76_S76	9	Non-pathogenic	2377	1381	Negative
Maria-B2-9_S9	9	Non-pathogenic	2377	1381	Negative
M-B14-423	9	Non-pathogenic	Singleton	2409	Negative
M-B14-422	9	Non-pathogenic	2408	2408	Negative
M-B14-424	9	Non-pathogenic	2408	2408	Negative
M-B14-425	9	Non-pathogenic	1356	1356	Negative
M-B6-227_S22	9	Non-pathogenic	Singleton	1364	Negative
M-B4-157	9	Non-pathogenic	Singleton	1394	Negative
M-B6-211_S11	9	Non-pathogenic	Singleton	621	Negative
M-B6-212_S12	9	Non-pathogenic	Singleton	621	Negative
4057-75_S75	9	Non-pathogenic	975	975	Negative
2020Jan-S.suis-18_S18	9	Pathogenic	16	16	Positive
1237-20_S20	9	Pathogenic	108	1193	Positive
1237-21_S21	9	Pathogenic	108	1193	Positive
1237-23_S23	9	Pathogenic	108	1193	Positive
1237-24_S24	9	Pathogenic	108	1193	Positive
1237-25_S25	9	Pathogenic	108	1193	Positive
1237-26_S26	9	Pathogenic	108	1193	Positive
1237-28_S28	9	Pathogenic	108	1193	Positive
1237-29_S29	9	Pathogenic	108	1193	Positive
1237-39_S39	9	Pathogenic	108	1193	Positive
2020Jan-S.suis-1_S1	10	Non-pathogenic	Singleton	1335	Negative
2020Jan-S.suis-4_S4	10	Non-pathogenic	Singleton	1335	Negative
4057-74_S74	10	Non-pathogenic	Singleton	1335	Negative
108-84D_S79	10	Non-pathogenic	Singleton	1394	Negative
4057-61_S61	11	Pathogenic	1331	1331	Positive
M-B6-201_S1	12	Non-pathogenic	1361	1357	Negative
4057-36_S36	13	Pathogenic	839	839	Positive
0435-26_S26	14	Pathogenic	1	1	Positive
0435-30_S30	14	Pathogenic	1	1	Positive
0435-31_S31	14	Pathogenic	1	1	Positive
108-19D_S19	14	Pathogenic	1	1	Positive
108-42D_S41	14	Pathogenic	1	1	Positive
108-43D_S42	14	Pathogenic	1	1	Positive
108-48D_S47	14	Pathogenic	1	1	Positive
108-56D_S53	14	Pathogenic	1	1	Positive
108-80D_S75	14	Pathogenic	1	1	Positive
1237-7_S7	14	Pathogenic	1	1	Positive
1237-9_S9	14	Pathogenic	1	1	Positive
2957-6_S6	14	Pathogenic	1	1	Positive
M-B11-350	14	Pathogenic	1	1	Positive
M-B13-412	14	Pathogenic	1	1	Positive
M-B17-463	14	Pathogenic	1	1	Positive
M-B9-308_S18_L001	14	Pathogenic	1	1	Positive
M-B6-232_S27	15	Non-pathogenic	1361	1365	Negative
M-B7-261_S3	16	Non-pathogenic	Singleton	1367	Negative
M-B14-427	16	Non-pathogenic	Singleton	2393	Negative
2020Jan-S.suis-15_S15	16	Non-pathogenic	Singleton	1408	Negative
M-B11-355	16	Non-pathogenic	1827	1827	Negative
M-B11-356	16	Non-pathogenic	1827	1827	Negative
M-B6-204_S4	18	Non-pathogenic	1358	1358	Negative
0435-21_S21	18	Pathogenic	1178	1377	Positive
Maria-B3-120_S7	19	Pathogenic	1290	778	Positive
M-B9-299_S9_L001	19	Pathogenic	1178	1829	Positive
108-95D_S90	23	Non-pathogenic	Singleton	1399	Negative
0435-33_S33	23	Pathogenic	108	108	Positive
2020Jan-S.suis-34_S34	23	Pathogenic	108	108	Positive
2957-1_S1	23	Pathogenic	108	108	Positive
2957-10_S10	23	Pathogenic	108	108	Positive
2957-11_S11	23	Pathogenic	108	108	Positive
2957-12_S12	23	Pathogenic	108	108	Positive
2957-13_S13	23	Pathogenic	108	108	Positive
2957-25_S25	23	Pathogenic	108	108	Positive
2957-36_S36	23	Pathogenic	108	108	Positive
2957-40_S40	23	Pathogenic	108	108	Positive
2957-50_S50	23	Pathogenic	108	108	Positive
4057-12_S12	23	Pathogenic	108	108	Positive
M-B12-363_S19_L001	23	Pathogenic	108	108	Positive
M-B6-234_S29	23	Pathogenic	108	108	Positive
M-B6-235_S30	23	Pathogenic	108	108	Positive
M-B6-236_S31	23	Pathogenic	108	108	Positive
M-B6-240_S35	23	Pathogenic	108	108	Positive
M-B9-294_S4_L001	23	Pathogenic	108	108	Positive
M-B9-295_S5_L001	23	Pathogenic	108	108	Positive
0435-18_S18	23	Pathogenic	108	1376	Positive
1237-30_S30	23	Pathogenic	108	1376	Positive
108-70D_S67	24	Non-pathogenic	Singleton	1391	Negative
108-28D_S27	28	Non-pathogenic	Singleton	1382	Negative
108-29D_S28	30	Non-pathogenic	Singleton	1383	Negative
2957-27_S27	31	Non-pathogenic	Singleton	1414	Negative
M-B9-291_S1_L001	31	Non-pathogenic	Singleton	1828	Negative
108-74D_S69	31	Non-pathogenic	Singleton	1398	Negative
M-B13-382	31	Non-pathogenic	Singleton	2284	Negative
108-90D_S85	31	Non-pathogenic	Singleton	1397	Negative
Maria-B3-133_S20	31	Non-pathogenic	1686	1345	Negative
Maria-B2-14_S14	31	Non-pathogenic	975	1215	Negative
4057-44_S44	31	Non-pathogenic	Singleton	1422	Negative
M-B6-246_S41	1/2	Pathogenic	28	28	Positive
M-B6-250_S45	1/2	Pathogenic	28	28	Positive
M-B6-252_S47	1/2	Pathogenic	28	28	Positive
2020Jan-S.suis-10_S10	1/2	Pathogenic	28	28	Positive
2020Jan-S.suis-26_S26	1/2	Pathogenic	28	28	Positive
Maria-B2-11_S11	1/2	Pathogenic	28	28	Positive
Maria-B2-28_S28	1/2	Pathogenic	28	28	Positive
Maria-B3-115_S2	1/2	Pathogenic	28	28	Positive
Maria-B3-131_S18	1/2	Pathogenic	28	28	Positive
M-B10-323	1/2	Pathogenic	28	28	Positive
M-B10-325	1/2	Pathogenic	28	28	Positive
M-B10-326	1/2	Pathogenic	28	28	Positive
M-B10-327	1/2	Pathogenic	28	28	Positive
M-B10-333	1/2	Pathogenic	28	28	Positive
M-B12-376_S11_L001	1/2	Pathogenic	28	28	Positive
M-B5-188_S16	1/2	Pathogenic	28	28	Positive
M-B9-292_S2_L001	1/2	Pathogenic	28	28	Positive
M-B9-293_S3_L001	1/2	Pathogenic	28	28	Positive
M-B9-303_S13_L001	1/2	Pathogenic	28	28	Positive
Maria-B2-10_S10	1/2	Pathogenic	28	961	Positive
1237-10_S10	1/2	Pathogenic	28	1180	Positive
0435-20_S20	1/2	Pathogenic	1178	1377	Positive
108-96D_S91	Untypable	Non-pathogenic	Singleton	1400	Negative
M-B12-360_S16_L001	Untypable	Non-pathogenic	Singleton	2683	Negative
108-41D_S40	Untypable	Non-pathogenic	1384	1384	Negative
108-94D_S89	Untypable	Non-pathogenic	1361	1357	Negative
M-B5-181_S9	Untypable	Non-pathogenic	1361	1357	Negative
1237-13_S13	Untypable	Non-pathogenic	Singleton	1404	Negative
Maria-B2-30_S30	Untypable	Non-pathogenic	Singleton	1342	Negative
M-B5-179_S7	Untypable	Non-pathogenic	1356	1356	Negative
M-B6-209_S9	Untypable	Non-pathogenic	Singleton	1362	Negative
2020Jan-S.suis-5_S5	Untypable	Non-pathogenic	Singleton	1411	Negative
M-B6-205_S5	Untypable	Non-pathogenic	1361	1361	Negative
1237-11_S11	Untypable	Non-pathogenic	Singleton	1403	Negative
4057-79_S79	Untypable	Pathogenic	54	54	Positive
4057-82_S82	Untypable	Pathogenic	54	54	Positive
108-30D_S29	Untypable	Pathogenic	28	28	Positive
2957-17_S17	Untypable	Pathogenic	28	28	Positive
2957-20_S20	Untypable	Pathogenic	28	28	Positive
4057-27_S27	Untypable	Pathogenic	28	28	Positive
4057-45_S45	Untypable	Pathogenic	28	28	Positive
4057-63_S63	Untypable	Pathogenic	28	28	Positive
4057-66_S66	Untypable	Pathogenic	28	28	Positive
4057-70_S70	Untypable	Pathogenic	28	28	Positive
Maria-B2-18_S18	Untypable	Pathogenic	28	28	Positive
Maria-B2-21_S21	Untypable	Pathogenic	28	28	Positive
Maria-B2-3_S3	Untypable	Pathogenic	28	28	Positive
M-B10-328	Untypable	Pathogenic	28	28	Positive
M-B6-228_S23	Untypable	Pathogenic	28	28	Positive
M-B6-230_S25	Untypable	Pathogenic	28	28	Positive
M-B6-248_S43	Untypable	Pathogenic	28	28	Positive
M-B6-251_S46	Untypable	Pathogenic	28	28	Positive
M-B8-281_S13	Untypable	Pathogenic	28	28	Positive
M-B8-290_S22	Untypable	Pathogenic	28	28	Positive
M-B13-384	Untypable	Pathogenic	28	961	Positive
M-B4-150_S13	Untypable	Pathogenic	28	961	Positive
M-B4-152_S15	Untypable	Pathogenic	28	961	Positive
M-B5-182_S10	Untypable	Pathogenic	28	961	Positive
M-B5-185_S13	Untypable	Pathogenic	28	961	Positive
M-B6-239_S34	Untypable	Pathogenic	28	961	Positive
M-B7-273_S15	Untypable	Pathogenic	28	1371	Positive
2957-22_S22	Untypable	Pathogenic	485	485	Positive
2957-33_S33	Untypable	Pathogenic	17	17	Positive
4057-39_S39	Untypable	Pathogenic	17	17	Positive
4057-38_S38	Untypable	Pathogenic	94	94	Positive
1237-42_S42	Untypable	Pathogenic	108	108	Positive
M-B4-147_S10	Untypable	Pathogenic	108	108	Positive
M-B5-189_S17	Untypable	Pathogenic	108	108	Positive
M-B17-464	Untypable	Pathogenic	25	25	Positive
M-B4-154_S17	Untypable	Pathogenic	25	25	Positive
M-B4-155_S18	Untypable	Pathogenic	25	25	Positive
M-B4-156_S19	Untypable	Pathogenic	25	25	Positive
M-B4-160_S23	Untypable	Pathogenic	25	25	Positive
1237-27_S27	Untypable	Pathogenic	108	1193	Positive
4057-69_S69	Untypable	Pathogenic	Singleton	1334	Positive
4057-32_S32	Untypable	Pathogenic	839	119	Positive
4057-40_S40	Untypable	Pathogenic	839	119	Positive
4057-56_S56	Untypable	Pathogenic	839	119	Positive
M-B13-383	Untypable	Pathogenic	108	969	Positive
M-B4-146_S9	Untypable	Pathogenic	108	969	Positive
4057-60_S60	Untypable	Pathogenic	1331	1331	Positive
4057-62_S62	Untypable	Pathogenic	1331	1331	Positive
2020Jan-S.suis-22_S22	Untypable	Pathogenic	977	977	Positive
2957-3_S3	Untypable	Pathogenic	977	977	Positive
Maria-B2-6_S6	Untypable	Pathogenic	977	977	Positive
M-B6-244_S39	Untypable	Pathogenic	977	977	Positive
M-B6-249_S44	Untypable	Pathogenic	977	1366	Positive
0435-11_S11	Untypable	Pathogenic	1	1	Positive
0435-15_S15	Untypable	Pathogenic	1	1	Positive
0435-27_S27	Untypable	Pathogenic	1	1	Positive
108-31D_S30	Untypable	Pathogenic	1	1	Positive
108-37D_S36	Untypable	Pathogenic	1	1	Positive
1237-15_S15	Untypable	Pathogenic	1	1	Positive
1237-19_S19	Untypable	Pathogenic	1	1	Positive
1237-22_S22	Untypable	Pathogenic	1	1	Positive
1237-35_S35	Untypable	Pathogenic	1	1	Positive
1237-38_S38	Untypable	Pathogenic	1	1	Positive
1237-8_S8	Untypable	Pathogenic	1	1	Positive
2020Jan-S.suis-69_S68	Untypable	Pathogenic	1	1	Positive
2020Jan-S.suis-8_S8	Untypable	Pathogenic	1	1	Positive
2957-28_S28	Untypable	Pathogenic	1	1	Positive
2957-39_S39	Untypable	Pathogenic	1	1	Positive
2972-3_S28	Untypable	Pathogenic	1	1	Positive
2972-5_S30	Untypable	Pathogenic	1	1	Positive
4057-15_S15	Untypable	Pathogenic	1	1	Positive
4057-17_S17	Untypable	Pathogenic	1	1	Positive
4057-18_S18	Untypable	Pathogenic	1	1	Positive
4057-20_S20	Untypable	Pathogenic	1	1	Positive
4057-21_S21	Untypable	Pathogenic	1	1	Positive
4057-4_S4	Untypable	Pathogenic	1	1	Positive
4057-5_S5	Untypable	Pathogenic	1	1	Positive
4057-55_S55	Untypable	Pathogenic	1	1	Positive
4057-6_S6	Untypable	Pathogenic	1	1	Positive
4057-68_S68	Untypable	Pathogenic	1	1	Positive
4057-9_S9	Untypable	Pathogenic	1	1	Positive
Maria-B2-2_S2	Untypable	Pathogenic	1	1	Positive
Maria-B3-123_S10	Untypable	Pathogenic	1	1	Positive
Maria-B3-128_S15	Untypable	Pathogenic	1	1	Positive
M-B12-364_S20_L001	Untypable	Pathogenic	1	1	Positive
M-B12-365_S21_L001	Untypable	Pathogenic	1	1	Positive
M-B12-373_S29_L001	Untypable	Pathogenic	1	1	Positive
M-B12-374_S30_L001	Untypable	Pathogenic	1	1	Positive
M-B12-375_S31_L001	Untypable	Pathogenic	1	1	Positive
M-B13-378	Untypable	Pathogenic	1	1	Positive
M-B14-429	Untypable	Pathogenic	1	1	Positive
M-B17-458	Untypable	Pathogenic	1	1	Positive
M-B17-460	Untypable	Pathogenic	1	1	Positive
M-B17-462	Untypable	Pathogenic	1	1	Positive
M-B17-472	Untypable	Pathogenic	1	1	Positive
M-B17-477	Untypable	Pathogenic	1	1	Positive
M-B5-173_S1	Untypable	Pathogenic	1	1	Positive
M-B5-177_S5	Untypable	Pathogenic	1	1	Positive
M-B5-187_S15	Untypable	Pathogenic	1	1	Positive
M-B6-203_S3	Untypable	Pathogenic	1	1	Positive
M-B6-242_S37	Untypable	Pathogenic	1	1	Positive
M-B7-271_S13	Untypable	Pathogenic	1	1	Positive
